# Supplementary material for: Measurement report: Ice nucleating abilities of biomass burning, African dust, and sea spray aerosol particles over the Yucatan Peninsula
Source: Copernicus journal article supplement (doi:10.5194/acp-2020-783), 2020-08-14
Supplement: Supplementary file [file acp-2020-783-AC1-supplement.pdf]

We would like to thank the Reviewers for their constructive suggestions, which helped us to improve the manuscript. Specific answers and manuscript modifications related to the Reviewers comments are given below in red text.

### Reviewer 1

**General comment.** This study investigated ice-nucleating particles of size-segregated particles in tropical latitudes. Three types of common particles were studied: Marine, biomass burning and desert dust particles. Five field campaigns were conducted at two different sites in Mexico, and this is the first comprehensive study conducted in that area. The ice-nucleating abilities of the particles were tested in the new setup UNAM-MOUDI-DFT. INP concentrations varied between the different sampling events. The highest concentrations were observed during desert dust events, while the more ice-active particles were the marine aerosols, which sourced in the activity of cold front. Additionally, supermicron particles contributed most of the INPs in all particle types. This study is an important contribution to the cloud ice nucleation field, which presents a novel data collected in order to improve the understanding, characterization and quantification of ice nucleating particles. The sampling was well planned and the experiments were well designed. The results are well interpreted and clearly presented, and the data supports the conclusions. The manuscript is well written and within the scope of ACP. I recommend to accept this manuscript for publication in ACP after the authors will clarify and address the following comments.

A/ We thank the reviewer for her/his careful and detailed review and for his/her positive evaluation of the manuscript.

#### Major Comments

1. The introduction section should include some crucial knowledge that discussed in the manuscript. What are the physical and chemical properties of an INP? The relation between particle size and ice nucleation is missing for example. The different chemistry of the three aerosol types which were studied and how this will affect their ice nucleation abilities, as well as how will atmospheric transport expected to affect their activity. Perhaps what type of minerals are commonly transported from North Africa and how will this change with particle size. It may be important to mention the presence of mineral phases which occurs in biomass burning aerosols and what are the main differences from desert dust.

A/ We thank the reviewer for the suggestion. To provide a better context to the discussion section, the following text was added to the revised manuscript.

**Lines 74-79:** “Although it is not completely clear which physicochemical properties make an aerosol particle a good INP, its size (diameter  $>0.5 \mu\text{m}$ ), crystal structure (similar to the ice lattice structure), chemical composition (hygroscopicity and ability to form hydrogen bonds), insolubility (solid surface for the ice embryo formation), and the presence of active sites have been reported as key factors (Pruppacher and Klett, 1997; Murray et al., 2012; Kanji et al., 2017)”

**Lines 94-97:** “Mineral dust is mainly composed of clays (e.g., kaolinite, montmorillonite, illite), feldspars and quartz, among others (e.g., Zimmermann et al., 2008; Ardon-Dryer and Levin, 2014). The ice nucleating abilities of pure minerals, clays, and surrogates of natural mineral dust particles have been evaluated in the immersion freezing mode.”

**Lines 133-138:** “It is important to note that aerosol particles emitted by BB contain smoke and ash (Kanji et al., 2017). In general, BB particles are enriched in organic compounds, and to a lesser extent trace metals (Saarikoski et al., 2007). Jahn et al. (2020) showed that BB particles may contain calcite, sylvite, dolomite, potassium sulfate, and quartz. However, the mineral composition will differ depending on the combustion conditions, biomass source, and the chemical composition, among others.

**Lines 141-143:** “It has been shown that the composition of the marine aerosol (MA) strongly depends on the particle size, with the highest organic content found in submicron particles (O’Dowd et al., 2004; Prather et al., 2013; Quinn et al., 2015).”

**Lines 191-194:** “During long-range travel, the physicochemical properties (e.g., size, composition, morphology, hygroscopicity, etc.) of the transported aerosol particles can be modified due to atmospheric aging, thus, likely affecting their ice nucleating abilities (e.g., Kanji et al. 2017).”

2. In the section “The UNAM-DFT” there is no information about temperature calibration. I am concerned about the difference between the droplet’s temperature and the detector temperature. Are they both located at the same surface? How accurate is the freezing point detection at 10 CPM ramp (**L271**)? What is the resolution of temperature acquired data? Is the temperature uncertainty (0.1 °C) remains constant down to -40 °C?

A/ The RTD used to monitor the droplet's temperature is placed directly below the area we analyze with the DFT, as shown in Figure S1. This means that the temperature sensor is indeed on the same surface the droplets are located. Given that the temperature ramp is controlled by a thermocouple (also located on the same surface as the droplets and the RTD, Figure S1), a calibration of the readings reported by the RTD and the thermocouple against the temperature of the brand-new cooling bath was performed as shown in Figure A1.

As shown in Figure A1, the temperature data reported by the RTD is in good agreement with data reported from the Chiller which was calibrated by the manufacturer in Germany.

The precision of the temperature is 0.1°C and the uncertainty reported by the RTD varies between 0.1°C and 0.56°C when the temperature decreases. This is now acknowledged in the revised manuscript. **Lines 294-296:** “The temperature at the center of the sample holder was obtained with a resistance temperature detector

(RTD) with a precision of  $0.1^{\circ}\text{C}$  and an uncertainty of  $0.1^{\circ}\text{C}$  to  $0.56^{\circ}\text{C}$  between  $0^{\circ}\text{C}$  and  $-40^{\circ}\text{C}$ , respectively.”

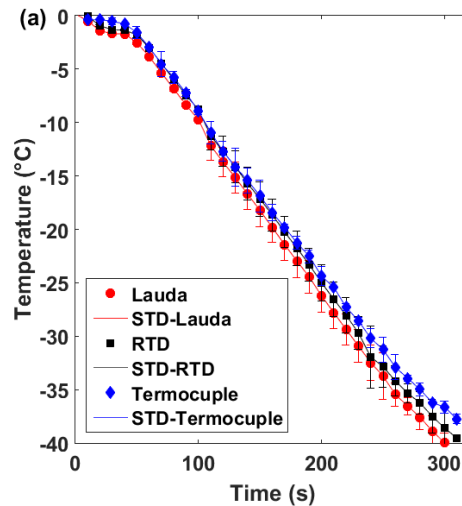

Figure A1. Comparison of temperature scans derived for the thermostat LAUDA PRO RP 1090 vs a resistance temperature detector (RTD) and a thermocouple immersed into the cooling bath. Each line represents the average of two experiments with its standard deviation.

3. Consider to improve the English of the manuscript.

A/ The text has been carefully revised by one the co-authors (D. Baumgardner), a native English speaker.

#### Minor comments

1. In the introduction section, starting from the third paragraph, there is a survey of atmospheric INP concentrations. The range of INP concentration depends on few factors, such as aerosol loading, sampling volume, and other technical issues, such as the droplets volume. It will be appreciated if the authors will add this important information to the introduction.

A/ Thank you for the suggestion. The following text was added to the revised manuscript.

**Lines 89-92** “Note that a direct comparison of the INP concentrations reported in different studies needs to be considered carefully, as there are factors associated with each technique/method such as sampling volume, droplet size, aerosol loading, aerosol particle size range, temperature range, among others, that could be influencing specific results.

2. In **L304**, what was the reason for two different sampling periods? Is it the aerosol load? I think this should be explained in the text.

A/ The reviewer is correct, the main reason was the aerosol loading. This is acknowledged in the revised manuscript. **Lines 361-362**: “Note that there were two

different sampling periods in Sisal to evaluate the interannual variability in aerosol loading”.

3. In **L373**, how ‘background conditions’ were determined in this study?

A/ The background was defined as the lowest PM<sub>2.5</sub> and PM<sub>10</sub> values within each sampling period when the chemical composition was available. This is acknowledged in the revised manuscript.

**Lines 437-439:** “The background days were defined as those with the lowest PM<sub>2.5</sub> and PM<sub>10</sub> values within each sampling period when the chemical composition was available.”

4. In **Figure 5**, how was the chemical composition quantified? It is written in the text that the elemental composition is obtained using XRF. There is a way to quantify the percentage of each element in this method? This should be mentioned in the text?

A/ The chemical composition was quantified using the following equation (Espinosa et al., 2010):

$$C_i = \frac{N_{X,i}A_F}{k_i QV}$$

Where  $C_i$  is the concentration ( $\mu\text{g m}^{-3}$ ) of element  $i$ ,  $N_{X,i}$  is the number of photons in the peak of spectra obtained by XRF of element  $i$ .  $A_F$  is the filter area used in the sampling,  $k_i$  is the signal perceived by the detector,  $Q$  is the total charge incident and  $V$  is the volume of air of the sampling collection. Finally, this concentration was converted into  $\text{ng m}^{-3}$ .

The following text was added to the revised manuscript. **Lines 373-375:** “The chemical composition was quantified using the methodology reported by Espinosa et al. (2010). Once the concentration of each analyzed element was obtained, the fraction (in percentage) with respect to the total mass concentration was derived.”

5. **Figure 8**, I do not understand what is the horizontal line over the bars at the higher temperatures.

A/ The horizontal lines correspond to the error bars; however, there was an issue with MatLab that was corrected in the revised version of the figure.

6. **Table S1**, why these samples were chosen? Different air mass categories?

A/ The Yucatan Peninsula is affected by cold fronts between November and March, by biomass burning emissions from Central America and south of Mexico between January and May, and by African dust between June and August. Therefore, different samples were collected during each of the above mentioned periods of interest. Although several samples were collected during each sampling period for ice nucleation analysis, Table S1 lists the samples where ice nucleation for the full size range was available (i.e., from  $0.32 \mu\text{m}$  to  $10 \mu\text{m}$ ).

The Table's caption was modified as follows: "Table S1. Summary of a subset of samples (those with the full size range available i.e., from 0.32  $\mu\text{m}$  to 10  $\mu\text{m}$ ) taken from Merida and Sisal during 2017 and 2018 to analyze the results presented in this study. MA, BB, and AD refer to marine aerosol, biomass burning, and African dust, respectively. \*two samples were collected at different times during the same day.

**Technical comments:**

**L32:** MicroOrifice should be Micro-Orifice  
A/ Corrected.

**L33-35:** Rephrase. Perhaps add "conditions" after "(AD)".  
A/ The word "intrusions" was added after "(AD)".

**L36:** Remove "characterizing".  
A/ Removed.

**L43:** What do you mean in this final note?  
A/ The sentence was deleted as it was redundant.

**L72:** You referred to the different freezing mechanisms as "pathways" in L57, and as "modes" in L72. I suggest to use the same term along the manuscript.  
A/ We agree with the reviewer and we decided to stick to "modes" in the revised manuscript.

**L76:** INP values in this paragraph are written in different formats. For example, 0.1 in L91 and  $2 \cdot 10^{-1}$  in L93. Perhaps best to use the same format.  
A/ Thank you for pointing this out. This was fixed in the revised manuscript.

**L86:** "eastern" should be "Eastern".  
A/ Corrected.

**L120:** Remove "the" before "sea".  
A/ Removed.

**L123:** "eastern" should be "Eastern".  
A/ Corrected.

**L130:** What do you mean "similar than"? Rephrase.  
A/ The sentence was deleted in the revised manuscript.

**L134:** -35 deg. Celsius and not per Liter.  
A/ We are sorry for the typo. This sentence was deleted in the revised manuscript.

**L138:** Why suddenly here you place the temperature range in brackets?  
A/ The sentence was deleted in the revised manuscript.

**L146-148:** Rephrase, this sentence does not read well.

A/ The following text was modified. **Lines 180-183:** “The highest probability for mineral dust to reach the Caribbean and Mexico occurs during the mid-summer drought (MSD), a period of a relative minimum in precipitation within the rainy season, typically between mid-July and mid-August.

**L163:** Rephrase, this part of the sentence does not read well.

A/ The sentence was modified as follows. **Lines 200-201:** “there is an urgent need to improve the current understanding of the role of aerosol particles, emitted in tropical latitudes, in cloud formation.

**L166:** Consider to add “the word “these” before “three”.

A/ Added.

**L169:** Remove “and methods”

A/ Removed.

**L191:** Merida is not affected by cold front as Sisal?

A/ Merida is also affected by cold fronts; however, the marine aerosol sampling was performed in Sisal, a site 50 m away from the shoreline with anthropogenic influences.

**L196:** Rephrase.

A/ The text was modified as follows. **Lines 235-237:** “A subset of the samples (those with the full size range available i.e., from 0.32  $\mu\text{m}$  to 10  $\mu\text{m}$ ) collected during the five campaigns was chosen for this study, as summarized in Table S1.

**L202:** Replace “efficiency” with “properties” or similar.

A/ “efficiency” was replaced by “abilities”.

**L210:** Remove “used” or add “in use” after “The MOUDI”.

A/ Removed.

**L213:** Replace “time” with “period”.

A/ Replaced.

**L235:** Where was the thermocouple placed?

A/ The thermocouple is placed in the holder sampling, next to the RTD. A tag was added to Figure S1 to indicate the position of the thermocouple.

**L255:** Remove “to”

A/ Removed.

**L261:** Replace “were’ with “was”.

A/ Replaced.

**L320:** What do you mean by “..from the University Network...”. It is where it was located?

A/ The University Network of Atmospheric Observatories (RUOA, in Spanish is Red Universitaria de Observatorios Atmosféricos) is a set of meteorological and air pollution observatories located in different cities in Mexico such as Merida and Sisal.

**L376:** “Indicate” should be “indicates”.

A/ Fixed.

**L377:** Replace “always” with “elements”.

A/ Replaced.

**L389:** “of the coast” should be “in the coast”.

A/ Fixed.

**L536-540:** This should be placed in the methodology section.

A/ Thank you for the suggestion. This text was moved to **Lines 343-348**.

**Table 1.** Which CPC model was used for 2017 BB sampling in Merida?

A/ Thank you for pointing this out. However, the CPC was removed from Table 1 as it was not used at all in the present study.

## Reviewer 2

In the here presented study, atmospheric aerosol at two different locations on the Yucatan peninsula (Mexico) was examined, with a focus on Ice Nucleating Particles (INP). Three different types of air masses were examined, and besides for INP properties, general aerosol properties and results from a chemical analysis were made in addition.

The work is adding to the valuable growing body of studies on atmospheric INP from a region where previously no measurements had been made. The instrumentation used for the INP measurements is a still quite novel one. So throughout the text a feeling arose that comparisons with literature were sought, maybe to confirm the measurement method. However, and this is one of my main criticism, are not always useful in the way they were made (more on that below at “specific comments”).

While the structure of the text is fine, it is occasionally difficult to follow when too many numbers were given in the text instead of discussing the general results. Again, more about this is given below.

My main concern is about the method used for determining INP concentrations. Likely, I assume, the issue is about the respective description of the method, which is not sufficient. And again, find more on that below at “specific comments”.

Additionally, the discrimination of the samples into three different phases was not motivated in a satisfactory way. It was not clearly described if/how samples were chosen amongst a larger batch or if they were really only discriminated through the time when they were samples. It was particularly shown that during the three different phases, there were variations in the chemical composition. That questions the discrimination into different phases as they were done. More on that also below.

Having said all that, the data and the manuscript as such are still valuable. So overall, I am sure that this manuscript can very likely be changed such that it can be published in ACP. However, major revisions are needed.

A/ We thank the reviewer for her/his careful and detailed review and for his/her positive evaluation of the manuscript. Below we answer each of the above mentioned concerns.

Regarding the used method, we would like to mention that a direct comparisons have already been made between the technique used in the current study and other apparatus commonly used to measure INP. Therefore, the apparatus has already been validated reasonably well and the point of the current study is not to validate the instrument.

- DeMott, P. J., et al. (2017). "Comparative measurements of ambient atmospheric concentrations of ice nucleating particles using multiple immersion freezing methods and a continuous flow diffusion chamber." *Atmospheric Chemistry and Physics* **17**(18): 11227-11245.
- Mason, R. H., et al. (2015). "The micro-orifice uniform deposit impactor–droplet freezing technique (MOUDI-DFT) for measuring concentrations of ice nucleating particles as a function of size: improvements and initial validation." *Atmospheric Measurement Techniques* **8**(6): 2449-2462.

### **Specific comments:**

Before going through the text line by line, up front here are my comments / concerns about three separate topics as indicated in the above text. I apologize for repetitions:

**(1)** Comparisons you make in the manuscript with data from literature do not always seem useful. While some of that is referred to again below, here my main concerns: You measure at different locations than other cited studies, with different distances to sources, so concentrations necessarily have to be different. In this respect, comparing concentrations does not make sense. Onset-temperatures are not useful for comparisons, either, as they depend on the amount of material sampled and the measurement method used. Surface site densities ( $n_s$ ) are useful for comparison, but only if the surface area is related to the same aerosol particle “type”: some studies only look at one specific type of INP as for example only a mineral dust (chamber studies) and will result in  $n_s$  for these dust particles, while other studies examine atmospheric particles and use the surface area of all particles and will then result in  $n_s$  for this type of air mass. This is not well discriminated in your study and below some specific parts of the text



related to this issue are given.

A/ Although the samples from the present study were indeed collected in different places than those reported in the literature (this is one of the novel parts), our intention is to evaluate how our results compare with respect to other studies carried out in similar environments and/or influenced by the same aerosol types. This is a very common practice in the ice nucleation community as the likelihood that two studies, on the same topic, are performed in the same place is extremely low. We are convinced that without these comparisons, we leave the readers without a clear context of where the present data stand out. Finally, the direct comparison of the INP concentrations and the  $n_s$  values reported by different methods/techniques from samples collected in very diverse environments, altitudes, and seasons are commonly reported (e.g., Hoose and Mohler, 2012; Murray et al., 2012; Petters and Wright 2015; Kanji et al. 2017; Welti et al. 2020 etc.). The following text was added to the revised manuscript to acknowledge that such comparisons need to be treated carefully.

**Lines 89-93:** “Note that a direct comparison of the INP concentrations reported in different studies needs to be considered carefully, as there are factors associated with each technique/method such as sampling volume, droplet size, aerosol loading, aerosol particle size range, temperature range, among others, that could be influencing specific results.

**(2)** Concerning your method: There are orders of magnitude more particles than there are INP, as you describe quite correctly in the introduction. Particles can be so small that you will not see them with your microscope (Fig. 2b will only show the largest ones). One droplet will certainly have a multitude of particles in it (compare Fig. 2b with 2d). That alone explains why you obtain useable results by looking at a comparably small number of droplets. But then, which fraction of the surface (i.e., of the sampled particles and therewith INP) is not included in droplets (between the visible droplets, but also on parts of the glass slide that are not examined at all)? And how many droplets will have more than one INP in them? How much does that influence the results? This is certainly included in the factors that are used in equation (2), but this is so essential to your method, that you can not only refer the reader to another publication. This needs to be explained in the manuscript (main text or at least in the SI). Some specific issues regarding your method already here:

A/ We thank the reviewer for this suggestion. The paper is designed to focus more on the scientific data than on the method itself since the technique was already described in great detail by Mason et al. (2015). If we add the requested data it will have to go in the SI. However, we do not see the utility of repeating the information that it is already reported in Mason et al. (2015) in the SI.

**line 237-238:** How stable is your temperature calibration? I somehow assumed you would use a paste that ensures good thermal conductivity between different metal parts of a set-up. Have you ever tried that?

A/ The cold cell was built in order that the RTD cylinder perfectly fits into the designated orifice. Additionally, the RTD was secured with an elastic band. This ensures a good contact between the RTD and the cold cell. A single test using the

thermal conductivity paste described in Mason et al. (2015) was performed confirming the above conclusion.

**line 266** and Fig. 2: How is the desired size decided? How about droplets containing more than one particle (which will have to be the case)? Fig. 2 looks as if droplets "eat up" other droplets. - How about one droplet including several INP?

Maybe that all is included in the corrections factors given in equation (2), but as this is a VERY crucial issue, this needs to be discussed in here, instead of only referring to another paper.

A/ The desired droplet size is around 170  $\mu\text{m}$  in diameter. Having smaller droplets will make it difficult to see the phase transition from liquid to ice as those droplets are quite dark. Similarly, having larger droplets reduces the number of droplets per experiment that resulted in low statistics. The following text was added to the revised manuscript. **Lines 305-306:** "Once the droplets have reached a diameter of  $\sim 170 \mu\text{m}$  (on average)".

Equation 2 considers the possibility of the existence of several particles within a droplet. Also, Equation 2 includes a correction of the analyzed area as the analyzed area with DFT is smaller ( $1.2 \text{ mm}^2$ ) compared with the total area of deposit of particles. The text was modified as follows.

**Lines 335-341:** "Equation 2 considers the possibility that multiple particles can be present within a droplet (Vali, 1971). As part of the data analysis, two corrections are included. The first is related to the total area covered by the particles deposited on the coverslips, which varies between  $425 \text{ mm}^2$  and  $605 \text{ mm}^2$  as a function of the MOUDI stage. The second is related to inhomogeneities in particle deposit. The correction factor associated with the nucleation events ( $f_{ne}$ ) was calculated with a 95% confidence level (Mason et al., 2015a). More details on these corrections can be found in Mason et al., (2015a)."

**(3)** The evaluation of the data based on different air masses which are assumed to predominantly appear during certain times of the year has its weaknesses. There are some high temperature INP that are ice active above  $-19\text{C}$  for samples classified as both MA and AD which are absent for BB. Other than that, all data are quite similar.

A/ The Yucatan Peninsula is affected by cold fronts between November and March, by biomass burning emissions from Central America and southern Mexico between January and May, and by African dust between June and August. Wind directions and synoptic patterns allow for the initial differentiation of air masses. And the different sampling campaign were intended to maximize the probabilities of encountering air masses with very distinct origins: marine air (MA), biomass burning (BB) and African dust (AD). Samples were collected during each of the periods of interest. The characteristics of each air mass were evaluated and assigned based upon the chemical composition of the aerosol particles collected during each period. As seen in Figure 5, aerosol composition is clearly different in each air mass category and in accordance to the literature (Figure 5). Also, the particle size distribution of

each sampling period was monitored as shown in Figure 6. Finally, Figure S3 shows that the air mass back trajectories for the MA, BB, and AD are very distinct.

Regarding the apparent similarity of the INP concentrations for all three periods, this is may be due to an optical effect. As shown below in Figure A2, when using different colors for each sample and period of interest, their differences are evident, given the broad range in values on the logarithmic y-axes.

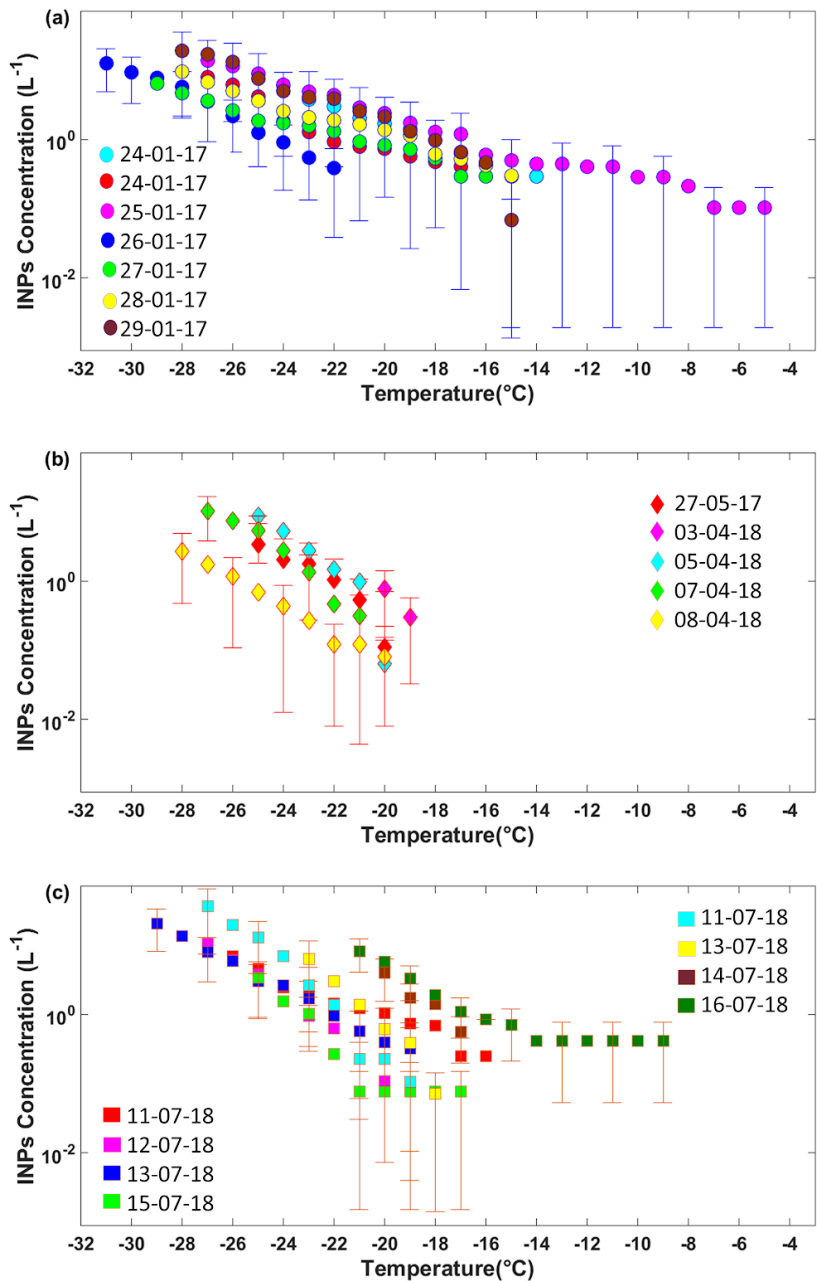

Figure A2: INP concentration curves to each air mass using different colors per sample. (Top) MA, (medium) BB, and (bottom) AD.

The comparisons of data from other locations, in which more clearly only certain air masses were measured seems a bit arbitrary, particularly as the results in here are not traced back to peculiarities of different air masses. Instead, the argument is that INP concentrations for MA are higher than at other marine locations because there were cold fronts with high winds while INP concentrations for AD are lower due to the larger distance. That all might make sense, but it could also be that AD and MA are similar in concentration as the sources in both cases were the same! Also, for BB, concentrations are low - but what was the background concentration before that air mass entered the BB region in Yucatan? Instead of comparing concentrations, which necessarily become lower further away from sources, it would be beneficial if only parameters as  $n_s$  would be compared. But as said above and again also below, care has to be taken to only compare to studies which were based on the same determination of the surface area (using all particles and not only a sub-fraction).

A/ Please see our answer to Major point (1).

**line 49:** “more than 50% of the precipitation is initiated via the ice phase”. It is not as easy as this - in the work you cite here, it is shown that this fraction depends on latitude and on land versus ocean. This number (50 %) for a global fraction is not given in the cited study, and I would advise you not to give such a clear number if it is not scientifically sound. "Large fractions" or something like that seems more appropriate.

A/ The text was modified as follows. **Lines 54-57:** “Globally, precipitation in the Intertropical Convergence Zone (ITCZ) and the continents is dominated by cold rain, and therefore, it is very important to fully understand the formation of ice in clouds (Mülmenstädt et al., 2015).

**line 64-65:** “Only 1 in  $10^5$  to  $10^6$  of the aerosol particles can act as INP at temperatures higher than  $-38\text{°C}$ ” - I know that something like that is often said, and I didn't check the citation here, but it is difficult to give such a fixed number, at least if it is not related to a temperature. If you look at the range of INP concentrations you've reported in the abstract, you'll see that this already covers almost 4 orders of magnitude. And your values do not cover the whole temperature range from  $-38\text{°C}$  to  $0\text{°C}$ , so the total range is MUCH larger. This shows that values within (only) one order of magnitude for the whole temperature range  $> -38\text{°C}$ , as you indicate it here, do not make sense. Saying "roughly one in a million at  $-20\text{°C}$ " would be a much better way of putting it. That can be estimated based on atmospheric samples in e.g., Petters & Wright, 2015.

A/ We agree with the reviewer that the number of aerosol particles acting as INPs is temperature dependent. However, Lines 64-65 (in the original manuscript) correspond to a general statement often reported in textbooks (e.g., Lohmann et al. 2016 page 226; Tomasi et al. 2017 pages 161 and 225) and ice nucleation papers (e.g., DeMott et al. 2010 and Boose et al. 2016, among others). Please note that our notation is exactly the same one used in Lohmann et al. (2016).

- DeMott, P. et al.: Predicting global atmospheric ice nuclei distributions and their impacts on climate, P. Natl. Acad. Sci., 107, 11 217–11 222, 2010.

- Boose, Y., et al.: Ice nucleating particles in the Saharan Air Layer, *Atmos. Chem. Phys.*, 16, 9067-9087, <https://doi.org/10.5194/acp-16-9067-2016>, 2016.
- Lohmann, U., Lüönd, F., and Mahrt, F.: *An Introduction to Clouds: From the Microscale to Climate*, Cambridge University Press, Cambridge, <https://doi.org/10.1017/CBO9781139087513>, 2016.
- Tomasi, C., Fuzzi, S., y Kokhanovsky, A. (2017). *Atmospheric aerosols: Life cycles and effects on air quality and climate*. John Wiley & Sons.

**line 122:** An even broader dataset on Arctic ambient INP was published in Wex et al. (2019), even pointing towards an annual cycle in INP concentrations across the Arctic.

A/ Thank you for the suggestion. The reference was added.

- Wex, H. et al. (2019), Annual variability of ice nucleating particle concentrations at different Arctic locations, *Atmos. Chem. Phys.*, 19, 5293–5311, doi:10.5194/acp-19-5293-2019.

**line 126ff:** This comment concerns all about the Welti et al. (2020)-ACPD-paper: It is a bit strange to give the results such detailed for a study that is still in discussion. Also, it is not clear why you give these values so detailed, anyway. If you want to compare with values from your own results, then give these details later. Here, in the introduction, these many numbers only make the text very difficult to read. I suggest to delete all these numbers from line 123 to line 138 and instead give only one or a few important statements from this study. Also a small remark: Is it generally know what "N-temperate zone" is? I guess this is an expression used in the here cited study, and if you want to use it, you have to define it, too.

A/ We understand the reviewer concern related to the Welti et al. (2020) study. However, it is important to note that the Welti et al. (2020) study is already accepted for its publication in ACP. We consider that it is very valuable to keep the Welti et al. (2020) study as it is a comprehensive study for marine aerosol, a key component of our manuscript.

Following the reviewer's suggestion, the text was modified as follows. **Lines 153-159:** "Welti et al. (2020) presented an analysis of the INP concentrations of ship-based measurements for different zones in the Arctic, Atlantic, Pacific, and the Southern Ocean. The different climatic zones covered in the Welti et al. (2020) study were divided depending on the latitude. For the tropical zone (23.5°N - 23.5°S), the authors report that the concentration of INPs vary between 0.001 L<sup>-1</sup> to 0.1 L<sup>-1</sup> at temperatures from -5°C to -25°C, and between 0.1 L<sup>-1</sup> to 10<sup>5</sup> L<sup>-1</sup> at lower temperatures i.e., from -24°C to -38°C."

**line 143-146:** DeMott et al. (2003) even showed that INP from the Sahara were found over Florida.

A/ The reference was added in this section.

**line 158-159:** Do you know the study by Schnell & Vali (1976)? They already report a dependence of INP concentrations with climate zones, albeit only based on leaf litter -read it and then decide yourself if it fits in here.

A / We thank the reviewer for the suggestion; however, we do not consider that the suggested study properly fits with our manuscript. We prefer to focus on other pioneering studies such as Rosinski et al. (1987) and Rosinski et al. (1988) that better align with the scope of the present study.

**Table 1** and related text: CPCs are mentioned in Table 1 but not in the text. If they were used for the here presented analysis, add a description to the text. If they were not used in this study, delete them from the table. Also: Which CPC was used in Merida in 2017? Please specify in the table! Also: Mini-Vol was an abbreviation used in the text, in the table it's MiniVol. Unify!

A/ The CPC was removed from Table 1 as it was not used in the present study. The word "MiniVol" was re-written in the text as suggested.

**line 196** and **line 369-370:** This is one of my main concerns: How were the samples included in this study chosen? Randomly? Or for which other reasons? Or were all collected filters included? If not, Did the choice of a subset influence the conclusions drawn from the study? As I understand, you just attribute different air masses to different seasons? Is that justified? There is a study by Wex et al. (2016), in which within one month on Barbados different air masses were observed (clean marine, marine with new particle formation, and African Dust), all advected across the Atlantic. That was the case in November, and again in April. Similarly, a certain air mass likely cannot be expected to be connected to a certain season at your sampling locations. Therefore: It at least has to be mentioned how you defined/chose the different air masses, and how you checked if all air masses during a sampling time belonged to the type of air mass you expect during this season.

A/ The Yucatan Peninsula is affected by cold fronts between November and March, by biomass burning emissions from Central America and South Mexico between January and May, and by African dust between June and August. Therefore, different samples were collected on each of the abovementioned periods of interest. Although several samples were collected during each sampling period for ice nucleation analysis, Table S1 lists the samples where ice nucleation for the full size range was available (i.e., from 0.32  $\mu\text{m}$  to 10  $\mu\text{m}$ ). During sampling and data analysis some samples got damaged, and therefore, the full size range was incomplete. Also, in some cases, too many particles impacted in the substrates which inhibits the proper formation of water drops. On those samples the ice nucleation experiments could not be performed, leaving the full size range also incomplete. In summary, the entire study and the drawn conclusions are based on the samples shown in Table S1.

The characteristics of each air mass were not simply assigned by the different seasons. The chemical composition of the aerosol particles collected during the MA, BB, and AD air masses are clearly different and in accordance with the literature (Figure 5). Also, the particle size distribution of each sampling period was monitored

as shown in Figure 6. Finally, Figure S3 shows that the air mass histories for the MA, BB, and AD are very distinct.

**line 215-216:** How much time passed between sampling and analysis? Give that number here. Have you ever tested if the INP concentration is influenced by storage at temperatures above 0°C? Most studies I am aware of freeze their samples prior to the analysis.

A/ Given that the aerosol sampling took place before the UNAM-MOUDI-DFT was fully operational and calibrated, the time that passed between the sampling and the ice nucleation analysis varied between 3 and 22 months. Note that it is very common to store the samples at 4°C (or even room temperature) when using the MOUDI-DFT (e.g., Mason et al. 2015; DeMott et al 2016; Mason et al. 2016; Si et al. 2018). Although in the previously mentioned studies the time that the samples were stored in the fridge did not exceed 7 months, Figure A3 shows that the frozen fraction for the biomass burning samples collected in (a) 2017 and (b) 2018 have a similar behavior. Note that the 2017 samples were stored for 24 months, while the 2018 samples were stored for 12 months.

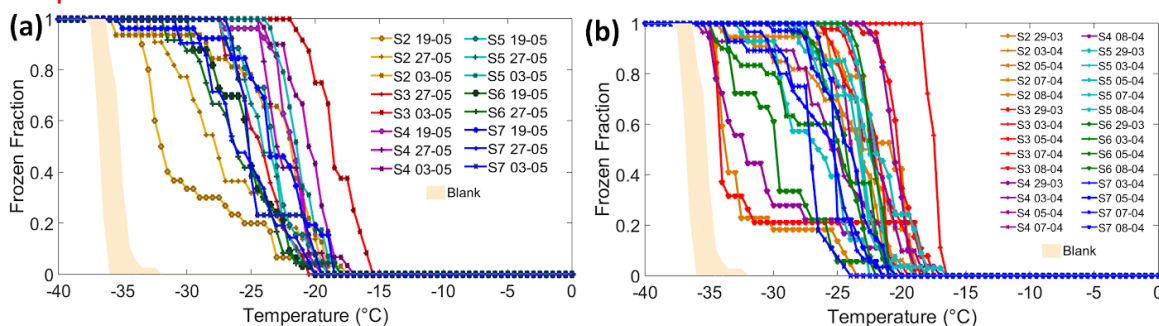

Figure A3: Frozen fraction curves for (a) 2017 and (b) 2018 biomass burning samples.

- Mason, R.H. et al.: Ice nucleating particles at a coastal marine boundary layer site: correlations with aerosol type and meteorological conditions, *Atmos. Chem. Phys.*, 15(21), 12547–12566, doi:10.5194/acp-15-12547-2015, 2015.
- Mason, R.H. et al.: Size-resolved measurements of ice-nucleating particles at six locations in North America and one in Europe, *Atmos. Chem. Phys.*, 16(3), 1637–1651, doi:10.5194/acp-16-1637-2016, 2016.
- DeMott, P.J., et al.: Sea spray aerosol as a unique source of ice nucleating particles, *Proc. Natl. Acad. Sci. U. S. A.*, 113(21), 5797–5803, doi:10.1073/pnas.1514034112, 2016.
- Si, M., et al.: Ice-nucleating ability of aerosol particles and possible sources at three coastal marine sites, *Atmos. Chem. Phys.*, 18(21), 15669–15685, doi:10.5194/acp-18-15669-2018, 2018.

**line 370ff:** You show in Fig. 5 and the related text, that “background conditions” were different from other days during the three different air mass types (particularly pronounced, to my understanding, for AD). How was this variability treated when you then summarized the results to obtain one value representative for the whole air

mass (as done for Fig. 6 and Fig. 8)? This is, again, linked to how you chose the samples that are presented here.

A/ The background was defined as the lowest PM<sub>2.5</sub> and PM<sub>10</sub> values within each sampling period where the chemical composition was available. This is mentioned in the revised manuscript.

**Lines 437-439:** “The background days were defined as those with the lowest PM<sub>2.5</sub> and PM<sub>10</sub> values within each sampling period when the chemical composition was available.”

Figure 6 does not relate to chemical composition as it illustrates the particle size distribution obtained from the optical particle counter (LasAir). Regarding Figure 8, it combines the INP concentration and the surface area derived from the data shown in Figure 6. Therefore, the background (mentioned in lines 370) does not have a direct link to neither Figure 6 nor Figure 8.

**line 392:** Of course, if there is also a marine influence (which is to be expected), then part of the sulfur will also come from the same sources as described for MA above. Reformulate this passage accordingly!

A/ Unfortunately, we do not have the means to differentiate between the different sources of sulfur. However, following the reviewer’s advice, the text was modified as follows. **Lines 458-462:** “Sulfur is the most abundant element observed in Merida under background conditions (Figure 5b, left panel). The presence of sulfur can be attributed to anthropogenic sources, such as light- and heavy-duty vehicles with diesel engines that are prevalent in Merida. Given the proximity of Merida to the Gulf of Mexico, part of the sulfur measured in Merida could originate from dimethyl sulfide (DMS).”

**line 429:** Am I right to assume that you calculated the particle concentration based on the measured size distributions? Please mention explicitly how concentrations were obtained!

A/ Although the optical particle counter (LasAir) directly reports the particle concentration for each size bin, the normalized particle concentration (as reported in Figure 6) was obtained as follows:

$$\text{normalized particle conc. (size bin } i) = \frac{\text{particle conc. (size bin } i)}{\text{size bin width (size bin } i)}$$

The text was modified for clarity as follows. **Lines 497-499:** “For all three air masses, the highest particle concentration (reported by the LasAir) was observed for particles with EODs between 0.3 μm and 0.5 μm.”

**line 453-454:** There are trade wind cumuli across the Atlantic and they can produce warm rain! Just for fun I opened "windy.com" while writing this, checked for clouds between Africa and Yucatan, and (as I expected and as you will always see) there sure were several locations with intense cloud fields. Please correct this statement!



It is clear, though, that particles are transported in "SAL" (Saharan Air Layer), and yes, "trickling out" from that indeed happens. But wet removal likely occurs, too.

A/ The text was modified as follows. **Lines 522-524:** "While crossing the Atlantic, many particles can be removed from the atmosphere by dry deposition and, to a lesser extent, by wet deposition as cloud cover is low during this season."

**line 461-463:** Was the study you cite here based on a lab-experiment? If yes, then the dilution of the air also will have played a role, and then it is not clear to me how representative this is for atmospheric concentrations, and this quote might not be very meaningful.

A/ The reviewer is correct. As the study was performed in laboratory conditions, it is not relevant to our manuscript, and therefore, it was deleted.

**line 467:** In Tab. S1, there are 7, 5, and 4+4=8 samples for MA, BB and AD, respectively. The number of data-sets shown in Fig. 7a seems lower. Is that so, and if yes, why?

A/ This is an optical effect. As shown below in Figure A2, when using different colors for each sample, the 20 curves are distinguishable.

**line 471-473:** "onset freezing temperatures" are not a good value for judging a data-set, as they will depend on the amount of air sampled and the instrumentation used for the evaluation. At least add this information, or better delete this sentence completely.

A/ We agree with the reviewer. Therefore, the sentence was deleted from the original manuscript.

paragraphs starting at **475** and at **488:** It is much better to give comparative data in a figure instead of giving a range of numbers in a text. Additionally, a concentration of INP always has to be given at a temperature. Giving a range of concentrations spread over a range of temperatures is not helpful, and comparing concentrations obtained at different temperatures or for different temperature ranges is not meaningful, either.

I suggest that you make an additional figure with your data with separate panels for the three air masses in which you always add the literature data you want to compare to. By reading this, one cannot understand the relation, and with this new figure you can avoid text filled with numbers which is difficult to read. And, as you quite correctly say, you are far away from the source, compared to the other studies to which you are comparing to, so that comparing a concentration is not the best thing to do, as a concentration HAS TO decrease further away from a source. Comparing intrinsic INP properties, such as  $n_s$ , makes more sense.

A/ We agree with the reviewer that  $n_s$  is the best way to compare different ice nucleation data sets, which is the reason for Figure S4. We feel that a new figure where we add the INP concentrations from the present study and compare them with the literature is not necessary.

**line 489:** Actually, INP concentrations for MA and AD are surprisingly similar, both in the range they cover and in their lowest and highest values (besides for these few

high temperature data points - but here it might be reflected that some samples collected more air volume than others), so your statement here does not reflect that correctly. I am not even sure if the discrimination between MA and AD makes sense? Couldn't there also be dust particles for some of the filters collected during MA? The one trajectory shown in the SI doesn't say much about this.

A/ Please see our answer to Major point (3).

The total volume of a given sample should not impact the INP concentration as we are reporting the INP concentration per liter of air. This means that each sample is normalized by its corresponding volume.

The discrimination of MA and AD is clearly detailed and supported in our manuscript. Note that between January and February (MA period) the chance that an air mass from Africa reaches Mexico is extremely low. At that time of the year, the air masses leaving the African continent towards the Atlantic move southward reaching South America (Kishcha et al. 2014). Finally, the impact of the physicochemical properties of the aerosol particles collected in MA and AD on ice nucleation is evident in Figure S4, where the  $n_s$  values obtained for both types of aerosol particles is clearly different.

- Kishcha, P., da Silva, A. M., Starobinets, B., Long, C. N., Kalashnikova, O., & Alpert, P. (2014). Meridional distribution of aerosol optical thickness over the tropical Atlantic Ocean. *Atmospheric Chemistry and Physics Discussions*, 14, 23309-23339.

Mineral dust particles are ubiquitous in the continents, and therefore, they cannot be completely ruled out. However, based on the clear differences of the MA and AD chemical composition shown in Figure 5, and the clear absence of Fe, Al, and Si during the MA period, we are confident that the source of aerosol particles collected during the MA and AD periods are completely different.

**line 511:** Why is the trajectory shown for BB in the SI so short? If African dust would have been sampled during BB, that could dominate what you see. Alternatively, it could explain that the data is quite low if BB would not have contributed much to INP and the air mass did not come from Africa. A longer trajectory can help the discussion.

A/ The BB trajectory was run for a shorter time because the BB emissions arriving at Merida are likely coming from fires located nearby, i.e., the southeastern region of the peninsula and Central America. Rios and Raga (2018) present the spatial distribution of fires in the region using 14 years of data, as seen in Figure A4.

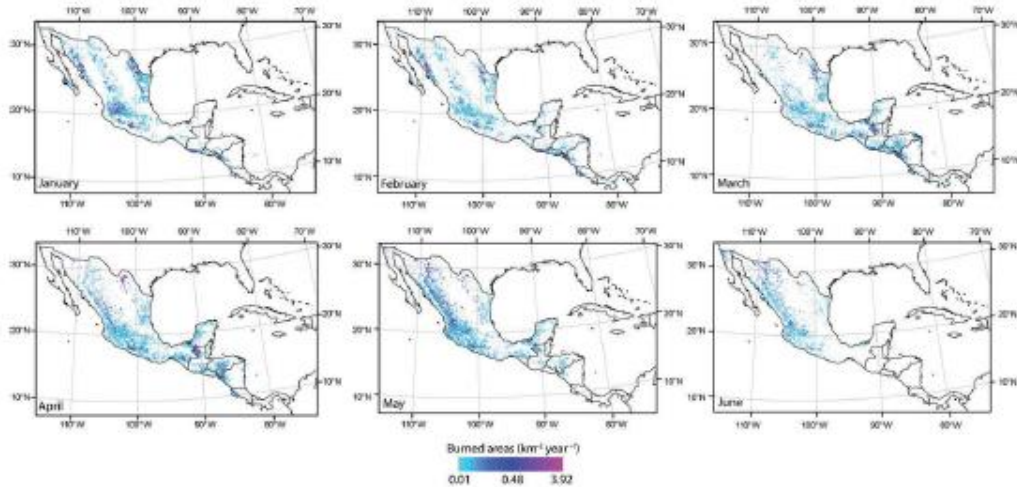

Figure A4. Spatial distribution of 14-year average of burned area ( $\text{km}^2$ ) in Mexico and Central America for the months of January- June.

Smoke plumes from these regional fires reach the sampling site in only a few hours. They are not advected from Africa and there is no need for longer backtrajectories. Note also that June has very few fires in southern Mexico and Central America, since the rainy season has already started. As explained in the previous answer, African dust can effectively reach Mexico between June and August (not in April), during the relative minimum in precipitation observed yearly associated with an intensification of the Caribbean Low Level Jet. Again, we invite the reviewer to check the clear differences in aerosol chemical composition during the AD and BB periods (Figure 5).

**line 519:** “(likely southern Mexico and Central America)” again made me wonder how you defined periods which were included in BB.

A/ As shown in Figure A, there is a clear BB season in Mexico and Central America with the highest burned areas found between April and May (Rios and Raga, 2018). Note that neither Cold fronts, nor African dust intrusion takes place in April (when the BB samples were collected).

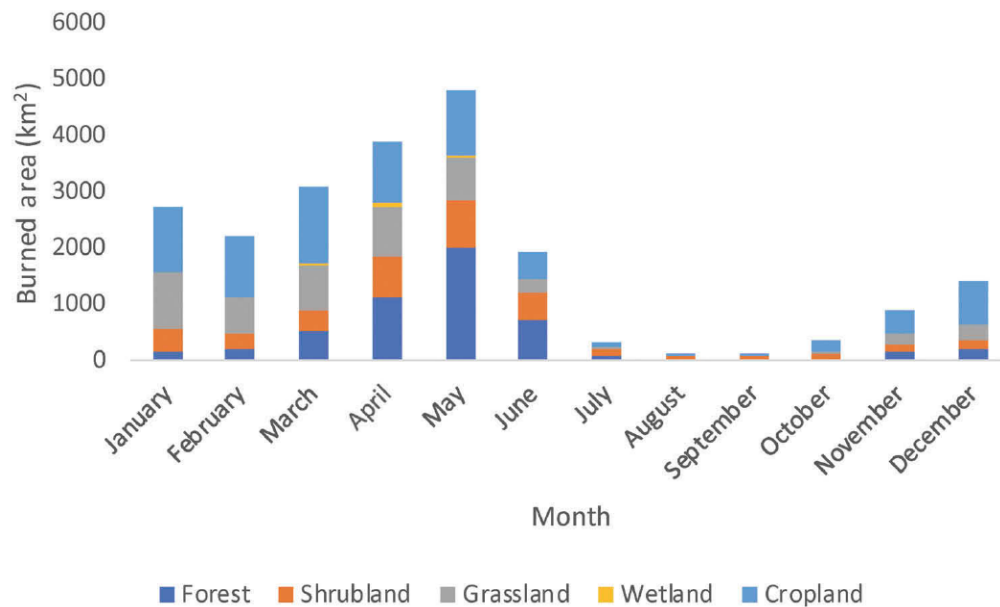

Figure A5. Annual cycle of burned area (in km<sup>2</sup>) over the period (2001–2014) in Mexico and Central America, as a function of the various land-cover types (Ríos and Raga, 2018).

- Ríos, B. and Raga, G. B.: Spatio-temporal distribution of burned areas by ecoregions in Mexico and central America, *Int. J. Remote Sens.*, 39(4), 949–970, doi:10.1080/01431161.2017.1392641, 2018.

**equation 3 and related text:** Was the total surface area based on the aerodynamic diameter at the sampling RH used, here? From the parameter-names you use in the main text and in the SI, it seems that this is not the case? Please explain all this in more detail, at least in the SI. If the aerodynamic diameter at the sampling RH was used to calculate  $n_s$ , then why? Typically, dry particle sizes are used. It is not described anywhere, why all these transformations are given in the SI for the calculation of surface active site density ( $n_s$ ) (aerodynamic to geometric, dry to RH). This certainly has to do with your optical size measurement, but all of this needs to be made clearer.

A/ We apologize for the confusion in this section. To calculate the  $n_s$  values, the particle concentrations were obtained from the optical particle counter LasAir. Therefore, in our analysis the equivalent optical diameter (directly reported by the LasAir) was used without any conversion and without the usage of the aerodynamic diameter. The text was modified to properly reflect the way  $n_s$  was calculated.

**line 541ff**, related to Fig. S4: Umo and Grawe only looked at ash particles, so their  $n_s$  relates to these, only. You include the surface area of all other particles, too, therefore it is logical that you end up with lower values. This should be said somewhere explicitly in order not to confuse the readers. Something similar is true for most of the studies you used here for comparison: They examined a separate substance. Even Price only used the surface area of the (massive) amounts of dust

particles, if I am not mistaken. It therefore makes perfect sense that mainly Gong fits as all others did not determine the  $n_s$  of an air mass with a mix of particles in it, but the  $n_s$  of one particle type. Also: are these separate components (starting with montmorillonite) your own measurements? Or else where do they come from? Adjust the text in the main manuscript accordingly!

A/ We are aware that our samples have a mixture of particles (as do most ambient samples). However, our intention when carrying out this analysis is to have a reference point with previous studies to infer if the samples collected at this tropical site are more (or less) efficient at nucleating ice. Note that several assumptions are made when calculating  $n_s$ , with the particle density ( $\rho_p$ ) being one of the most important. Typically, a representative  $\rho_p$  value is used for ambient samples as it is impossible to determine the  $\rho_p$  for each aerosol type present in mixed air masses.

**line 582-583:** As said above, INP concentrations of MA and AD were very similar as presented in Fig. 7 (as said, do not overinterpret the onset-temperatures), while indeed  $n_s$  was different. But are the INP in MA and SD clearly different? It's fine if this can be shown, but after going through the reviews, please adjust the text here accordingly.

A/ We agree with the reviewer that the INP concentrations shown in Figure 7 look rather similar for all three air masses. However, as shown in Figure A2 (above) there are significant differences within the three aerosol types. We do not think that we are overinterpreting the onset freezing temperatures. We are not comparing the ice nucleating abilities of the three air masses based on the onset freezing values, we did it based on the  $n_s$  values. In lines 582-582 (original manuscript) we are simply reporting what was observed in our study.

#### **Technical comments:**

**line 39-40:** Add the temperatures at which the INP concentrations given here are valid - without that, it cannot be judged if these are high or low.

A/ The corresponding freezing temperatures were added as follows: "AD (from 0.071 L<sup>-1</sup> to 36.07 L<sup>-1</sup> at temperatures between -18°C and -27°C), followed by MA (from 0.068 L<sup>-1</sup> to 18.90 L<sup>-1</sup> at temperatures between -15°C and -28°C), and BB (from 0.063 L<sup>-1</sup> to 10.21 L<sup>-1</sup>, at temperatures between -20°C and -27°C)."

**line 61:** Change "its" to "their".

A/ Thank you. Corrected.

**line 78:** "Augustin-Bauditz et al. (2008)": I checked, as the date struck me as quite early, but this is a publication from 2014. This study cited here also focusses on Kfeldspar as being the main mineral that drives ice nucleation, so it could additionally fit to what is said in line 84. (Discovery of this slip caused that I randomly checked other citations as well - Welti et al. (2020) should be cited as given below, and in the SI, at least Grawe et al. (2016) is missing in the References. - There may be other issues, please check.)

A/ We apologize for these mistakes. The reference was corrected to "Augustin-Bauditz et al. (2014)"

\*The reference of Grawe et al. (2016) was added to the SI.

“Grawe, S., Augustin-Bauditz, S., Hartmann, S., Hellner, L., Pettersson, J. B. C., Prager, A., Stratmann, F. and Wex, H.: The immersion freezing behavior of ash particles from wood and brown coal burning, *Atmos. Chem. Phys.*, 16(21), 13911–13928, doi:10.5194/acp-16-13911-2016, 2016.”

\*As the Welti et al., (2020) was accepted the reference was modified as follows:

“Welti, A., Bigg, E. K., DeMott, P. J., Gong, X., Hartmann, M., Harvey, M., Henning, S., Herenz, P., Hill, T. C. J., Hornblow, B., Leck, C., Löffler, M., McCluskey, C. S., Rauker, A. M., Schmale, J., Tatzelt, C., van Pinxteren, M., and Stratmann, F.: Ship-based measurements of ice nuclei concentrations over the Arctic, Atlantic, Pacific and Southern Ocean, *Atmos. Chem. Phys.*, <https://doi.org/10.5194/acp-2020-466>, in press, 2020.”

**line 91-92:** The samples for this study were not taken on Cape Verde, but flying over the ocean around Cape Verde, with some flights closer to the African continent. Maybe say "... and -23\_C for airborne samples collected under dusty conditions around Cape Verde, Africa , ...".

A/ “around” was added.

**line 94-95:** If you follow the above advise, then here “in the same region” has to become "on one of the Cape Verde islands."

A/ We thank you for the suggestion. This was fixed.

**line 120:** Delete the second “the” (at “in the Arctic the”).

A/ Thank you. Removed.

**line 163:** Add “of the role” between “understanding” and “that”.

A/ The sentence was modified as follows. **Lines 200-201:** "there is an urgent need to improve the current understanding of the role of aerosol particles, emitted in tropical latitudes, in cloud formation".

**line 190:** Concerning “20\_C and 34\_C”: What are these two different temperatures (different seasons? day and night)? Why are there two values here while above it was only one value for Merida and the Yucatan peninsula?

A/ The sentence was modified as follows. **Lines 229-230:** “The mean temperature and RH are 27°C and 80.8%, respectively.”

**line 191:** For the RH, the "+" part here makes no sense, as that ends up well above 100%.

A/ The sentence was modified as follows. **Lines 229-230:** “The mean temperature and RH are 27°C and 80.8%, respectively.”

**line 196:** Exchange “for presented” with either "for presentation" or "to be presented".

A/ Thank you. Corrected.

**line 228:** Better use “consists of” instead of “is integrated by”.

A/ Thank you. Corrected.

**line 230 and line 232 and line 236:** cm<sup>3</sup> (not only cm)!

A/ We are reporting the dimensions of the cell and blocks and not the volume. This was fixed.

**line 235:** Where is this thermocouple? Maybe explicitly hint to Fig. S1 here, too.

A/ Thank you. This is now indicated in Figure S1.

**line 251:** How is the air “generated”? Maybe better: "added to the nitrogen flow when it is conducted ...".

A/The text was modified as follows. **Lines 290-291:** “dry conditions are experienced when nitrogen is injected and flows towards the sample”.

**line 255:** Do you know the temperature variation across the glass plate? Please add this information here.

A/ Although we assume that the temperature across the glass plate is constant, we did not evaluate this as the experiments are performed in a very small area (1.2 mm<sup>2</sup>). The RTD is placed right below the area we analyze in the DFT.

**line 261:** Be careful with the time form you use - this whole paragraph is in present tense, besides for this "were", here. -> are.

A/ Thank you. Fixed.

**line 261:** Instead of “with” better “on” or “in”.

A/ Thank you. Fixed.

**line 296:** Either " diameters ranging from ... to ..." or "diameters between . . . and . . .".

A/ Thank you. The word “ranging” was deleted.

**line 297:** Give the size range for which these two LasAir-instruments measured, in the text or table.

A/The text was modified as follows. **Lines 351-353:** “The particle size distributions for equivalent optical diameters (EOD) between 0.3 μm to 25 μm were obtained with optical particle counters, a PMS LasAir II 310A (0.3 μm to 25 μm) and PMS LasAir III 310C (0.3 μm to 10 μm).”

**line 325:** Why do you give two different lengths for the trajectories? Different for different samples / locations/ . . . ? Explain this in the text.

A/ There was a typo in this line as the back trajectories were run for 24 h and 13 days. The text was modified as follows.

**Line 386-389:** “The 24 h back trajectories were run for the BB events as they were likely locally emitted. On the other hand, the back trajectories for the cold fronts (MA) and African dust intrusions (AD) were run for 13 days as the particles carried by those events take several days to reach Mexico.”

**line 402:** Replace “areas” with “parts”.  
A/ Replaced as suggested.

**line 402:** Add “is” prior to “positively”.  
A/ We think the grammar is correct here.

**line 404:** Add “a comparatively high mass fraction of” between “contained” and “particles”.  
A/ Thank you. Your suggestion was added.

**line 427:** Fig. 6 shows the concentration, not the distribution -> correct.  
A/ The data shown in Figure 6 is actually an aerosol particle size distribution. It shows how the concentration of aerosol particles changes as a function of their size.

**line 487:** At least mention briefly, what the explanation is, that is given for your observation in the here cited publication.  
A/ The text was modified as follows. **Lines 556-559:** “Therefore, the high wind speeds associated with the cold fronts, and hence wave breaking, could have played an important role in the high INP concentrations measured in Sisal, as discussed in Ladino et al. (2019).”

**line 558:** Concerning “mixed-phase cloud formation“: this should better be “immersion freezing” - you do not mimic the formation of a cloud, that would be up to cloud chambers.  
A/ The sentence was modified as follows. **Lines 631-633:** “. This new device can be used to study ice formation via immersion freezing and can discriminate the INP concentrations as a function of the aerosol aerodynamic size from 0.32  $\mu\text{m}$  to 10  $\mu\text{m}$ ”

**line 561-564:** As that PICNIC-study is not a topic described in your manuscript (besides that you mentioned that this other study exists), this should not be part of these conclusions here. Sentence should be deleted.  
A/ We respectfully disagree with the reviewer. Given that the present study also covers the performance of the UNAM-MOUDI-DFT, we are convinced that this sentence can serve as a guide to the readers interested in our device. Similar statements can be often found in the conclusions of scientific publications.

**line 576:** Concerning “and also at tropical latitudes.” - How about Gong et al. (2020), which you’ve cited a number of times?



A/ Gong et al. (2020) was indeed performed at Tropical Latitudes; however, the authors focused on a single aerosol type (MA), instead of three different and distinct air masses as in the present study.

**Fig. 4:** In the caption: “Khon” -> “Kohn”.

A/ Thank you. This was fixed.

**Fig. 7b:** Black writing in a dark blue field is quasi invisible - change color of the text to white.

A/ Thank you. This was fixed.

**SI, Fig. S3:** Typically the sequence you used so far is "MA", "BB", "AD" (following the sequence with which you sampled), so it is a bit confusing that the latter two are swapped, here. Please exchange.

A/ Thank you. This was fixed.

**SI, line 89:** “base” -> “based”.

A/ Thank you. This was fixed.
